# Supplementary material for: Active pediatric HIV case finding in Kenya and Uganda: A look at missed opportunities along the prevention of mother-to-child transmission of HIV (PMTCT) cascade
Source: PubMed Central journal article supplement (PMC7266341; doi:10.1371/journal.pone.0233590), 2020-06-02
Supplement: pone.0233590.s001.pdf [file pone.0233590.s001.pdf]

## Pediatric Active Case Finding of HIV through Facility and Community-based Testing Strategies (PedAC Study)

Interview date:   /   /   (dd-mm-yy)Interviewer ID:  

Health facility name: \_\_\_\_\_

Health facility ID:  

Community catchment area (if applicable): \_\_\_\_\_

Community testing organization (if applicable): \_\_\_\_\_

### Section A: Child HIV Testing Services

*Questions in this section should be asked to health worker or abstracted from records.*

1. Where was CHILD tested?

- (1) Maternal and Child Health Clinic (MCH)/PMTCT
- (2) Outpatient department (OPD)
- (3) Inpatient Department (IPD)
- (4) Home-based/door-to-door testing
- (5) Malnutrition
- (6) TB Clinic
- (7) Under 5/EPI (Immunization) Clinic/Child Welfare Clinic (CWC)
- (8) Voluntary Medical Male Circumcision (VMMC)
- (9) Comprehensive Care Clinic (CCC)
- (10) KYCS campaign
- (11) OVC service organization
- (12) Community outreach/child health days
- (88) Other, specify: \_\_\_\_\_

2. Through what approach was CHILD tested?

- (1) PITC
- (2) Family testing
- (3) VCT
- (88) Other, specify: \_\_\_\_\_

### Section B: Introductory Questions

*Questions in this section should be asked to both biological and non-biological caregivers and emancipated minors (if applicable).*

3. Who does CHILD live with? (select all that apply)

- (1) Biological mother
- (2) Biological father
- (3) Sibling
- (4) Step-parent
- (5) Grandparent
- (6) Other relative, e.g., aunt, uncle, cousin, etc.
- (88) Other, specify: \_\_\_\_\_

4. Does CHILD meet the definition of emancipation per regulatory guidelines?

- (1) Yes – Skip to Q26

- (2) No  
 (77) N/A

5. What is the caregiver's relationship to the child?  
 (1) Biological mother  
 (2) Biological father  
 (3) Sibling  
 (4) Step-parent  
 (5) Grandparent  
 (6) Other relative, e.g., aunt, uncle, cousin, etc.  
 (88) Other, specify: \_\_\_\_\_

### Section C: Demographic Information

*Questions in this section should be asked to both biological and non-biological caregivers.*

6. What is the sex of the caregiver?  
 (1) Male  
 (2) Female
7. What is the caregiver's age? \_\_\_\_\_ years
8. What is the caregiver's current marital status?  
 (1) Married or living with partner as a couple  
 (2) Never married or not living with partner  
 (3) Divorced/Separated  
 (4) Widowed
9. What is the highest level of education the caregiver completed at school?  
 (1) Some Primary  
 (2) All Primary  
 (3) Secondary  
 (3) Post-secondary/high school  
 (4) Tertiary  
 (5) Never attended school

### Section D: Caregiver HIV Testing and ART History

*All questions in this section should be asked to both biological and non-biological caregivers. Please remember you do not have to answer any questions if you are not comfortable.*

10. What is the caregiver's HIV status?  
 (1) HIV-positive  
 (2) HIV-negative, tested in the last 3 months - *skip to Q16*  
 (3) HIV-negative, tested more than 3 months ago - *skip to Q16*  
 (4) Prefer not to answer - *skip to Q16*  
 (99) Don't know (if it has been more than 3 months since the last HIV-negative test) - *skip to Q16*
11. Who has the caregiver told about his/her HIV-positive status? (*Select all that apply*)  
 (1) No one  
 (2) Partner  
 (3) Another person

(4) Just found out status today

12. Is the caregiver currently on ART?

- (1) Yes – skip to Q14  
 (2) No

13. If not currently on ART, what are the reason(s)? (select all that apply)

- (1) Stock-out of medication  
 (2) Experience of side effects  
 (3) Not permitted by spouse or other family member  
 (4) Did not want others to know I'm HIV-positive  
 (5) Took traditional medicine instead  
 (6) Experience of mental health issues  
 (7) Religious reasons  
 (8) Fear of lifelong treatment  
 (9) Financial reasons  
 (88) Other, specify: \_\_\_\_\_

14. When was the caregiver first initiated on antiretroviral treatment?   /   /    
(dd/mm/yy) - skip to Q16

- (99) Unknown - skip to Q16  
 (77) N/A-never initiated

15. If never initiated, why not? (select all that apply)

- (1) Never offered by health facility  
 (2) Not eligible for treatment (high CD4 count)  
 (3) Not permitted by spouse or other family member  
 (4) Did not want others to know I'm HIV-positive  
 (5) Took traditional medicine instead  
 (6) Experience of mental health issues  
 (7) Religious reasons  
 (8) Fear of lifelong treatment  
 (9) Financial reasons  
 (88) Other, specify: \_\_\_\_\_  
 (77) N/A

*Caregivers other than the biological mother or father should skip to Section F (Q26).*

### Section E: MCH and HIV Health-seeking Behavior

*Questions should be asked about the child diagnosed as HIV-positive (CHILD). The questions in this section should be directed towards the biological mother or father.*

16. Did the mother attend antenatal care when pregnant with this CHILD?

- (1) Yes  
 (2) No  
 (99) Don't know

17. Did the mother receive an HIV test while attending antenatal care with this CHILD?

- (1) Yes  
 (2) No-known HIV-positive - Skip to Q19  
 (3) No-not offered - Skip to Q19  
 (4) No-offered, but refused - Skip to Q19

(99) Don't know - *Skip to Q19*

18. What was the result of the mother's HIV test in ANC?

- (1) HIV-positive  
 (2) HIV-negative  
 (3) Prefer not to answer  
 (99) Don't know

19. Did the mother undergo couples testing with CHILD's father as part of antenatal care?

- (1) Yes  
 (2) No  
 (99) Don't know

20. What was the result of the CHILD's father's HIV test in ANC?

- (1) HIV-positive  
 (2) HIV-negative  
 (3) Not tested  
 (4) Prefer not to answer  
 (99) Don't know

21. When did the mother learn about her HIV-positive status?   /   /   (dd/mm/yy)

- (1) Not HIV-positive – *skip to Q26*  
 (99) Don't know  
 (77) N/A-never tested – *skip to Q26*

22. Did the mother receive antiretroviral medication during antenatal care with CHILD?

- (1) Yes – ARV prophylaxis– *skip to Q24*  
 (2) Yes – ART prophylaxis to be taken during pregnancy/breastfeeding only– *skip to Q24*  
 (3) Yes – ART to be taken for life – *skip to Q24*  
 (4) No  
 (5) Did not yet know HIV+ status – *skip to Q24*  
 (99) Don't know– *skip to Q24*

23. If the mother did not receive antiretroviral medications during antenatal care with CHILD, why not?

- (1) Never offered by health facility  
 (2) Did not yet know HIV status  
 (3) Not permitted by spouse or other family member  
 (4) Did not want others to know I'm HIV-positive  
 (5) Took traditional medicine instead  
 (6) Experience of mental health issues  
 (7) Religious reasons  
 (8) Fear of lifelong treatment  
 (9) Financial reasons  
 (88) Other, specify: \_\_\_\_\_  
 (99) Don't know

24. Did the mother receive antiretroviral medication during delivery or while breastfeeding CHILD?

- (1) Yes – ARV prophylaxis – *skip to Q26*  
 (2) Yes – ART prophylaxis to be taken during breastfeeding only– *skip to Q26*  
 (3) Yes – ART to be taken for life – *skip to Q26 (if answered 3 to Q22, this response should be the same)*  
 (4) No

- (5) Did not yet know HIV+ status – skip to Q26  
 (99) Don't know– skip to Q26

25. If the mother did not receive antiretroviral medications during delivery or while breastfeeding CHILD, why not?

- (1) Never offered by health facility  
 (2) Did not yet know HIV status  
 (3) Not permitted by spouse or other family member  
 (4) Did not want others to know I'm HIV-positive  
 (5) Took traditional medicine instead  
 (6) Experience of mental health issues  
 (7) Religious reasons  
 (8) Fear of lifelong treatment  
 (9) Financial reasons  
 (88) Other, specify: \_\_\_\_\_  
 (99) Don't know

### Section F: Child Medical, Growth and Developmental History

*Questions in this section should be asked to both biological and non-biological caregivers and emancipated minors (if applicable).*

26. What is the sex of CHILD?

- (1) Male  
 (2) Female

27. What is CHILD's date of birth?   /   /   (dd-mm-yy)

- (99) Don't know

28. Where was the CHILD delivered?

- (1) In a health facility  
 (2) At home  
 (88) Other, specify: \_\_\_\_\_  
 (99) Don't know

29. How long was CHILD breastfed?

- (1) \_\_\_ months  
 (77) N/A  
 (99) Don't know

30. Was ARV prophylaxis (Nevirapine) given to CHILD?

- (1) Yes  
 (2) No – skip to Q32  
 (99) Don't know

31. If yes, how long was ARV prophylaxis (Nevirapine) given to CHILD?

- (1) Single dose only or duration of BF  
 (2) For 6 weeks  
 (3) For the duration of breastfeeding  
 (88) Other, specify: \_\_\_\_\_  
 (99) Don't know

32. If ARV prophylaxis (Nevirapine) was not given to CHILD, why not? (select all that apply)

- (1) Never offered by health facility  
 (2) Did not yet know HIV status/not HIV-positive

- (3) Not permitted by spouse or other family member
- (4) Did not want others to know I'm HIV-positive
- (5) Took traditional medicine instead
- (6) Experience of mental health issues
- (7) Religious reasons
- (8) Financial reasons
- (9) Delivered at home and did not return to health facility
- (88) Other, specify: \_\_\_\_\_
- (99) Don't know

33. Was CHILD tested previously for HIV?

- (1) Yes
- (2) No - skip to Q36
- (99) Don't know - skip to Q37

34. At what age was the most recent HIV test (before today) performed? (Select months if CHILD was under 24 months of age and enter the number of months. Select years if CHILD was older than 24 months and enter a whole number for the age.)

- (1)   months
- (2)   years
- (99) Don't know

35. What was the result of the most recent HIV test (before today)?

- (1) HIV-negative
- (2) Indeterminate
- (3) Never received the result
- (99) Don't know

36. If CHILD had not been previously tested for HIV, why not? (select all that apply)

- (1) Never offered testing
- (2) Not permitted by spouse or other family member
- (3) Religious reasons
- (4) Caregiver feared child would experience stigma if positive
- (4) Caregiver did not feel s/he could manage CHILD's HIV care
- (88) Other, specify: \_\_\_\_\_
- (99) Don't know

37. Why was CHILD tested today? (select all that apply)

- (1) First time testing had been offered
- (2) CHILD had become very sick/weak
- (3) Testing services offered in community (did not have to attend facility)
- (4) Just wanted to know HIV status of CHILD
- (5) Parent had become sick/died
- (6) Sibling had become sick/died
- (7) Parent was known to be/tested HIV-positive
- (8) Sibling was known to be/tested HIV-positive
- (88) Other, specify: \_\_\_\_\_
- (99) Don't know

38. Was CHILD told about his or her status right after testing?

- (1) Yes
- (2) No
- (77) N/A (emancipated minor) – skip to Q41

39. Were other children in caregivers' care tested for HIV today?
- (1) Yes  
 (2) No  
 (77) N/A (no other children in care)
40. If yes, who was tested?
- (1) CHILD's siblings, if yes, how many? \_\_\_\_\_  
 (2) Other children in family or living in household, if yes, how many? \_\_\_\_\_  
 (3) Other adult family members, if yes, how many? \_\_\_\_\_
41. Who in CHILD's household has HIV? (*Select all that apply; do NOT include the respondent; do NOT anyone who tested HIV-positive today*)
- (1) No one  
 (2) Caregiver's partner  
 (3) Caregiver's parent  
 (4) Other child (biological)  
 (5) Other child (non-biological)  
 (6) Other relative/friend living in home  
 (88) Other, specify: \_\_\_\_\_

*Interviews with emancipated minors should end here and participants thanked for their time.*

### **Section G: Community and Facility-related Experiences**

*Questions in this section should be asked to both biological and non-biological caregivers.*

42. Do you currently participate in any HIV support group at this or other facility?
- (1) Yes  
 (2) No  
 (77) N/A-not HIV-positive
43. Do you belong to an ART buddy or community HIV support group?
- (1) Yes  
 (2) No  
 (77) N/A-not HIV-positive
44. From whom do you seek HIV or other health-related information when you have questions? (*select all that apply*)
- (1) No one  
 (2) Health care staff at this or another facility  
 (3) Community health worker  
 (4) HIV-positive peer  
 (5) Trusted friends or relatives  
 (88) Other, specify: \_\_\_\_\_
45. Do you think that the information or advice that you receive at the health facility or in the community helps you to take your HIV medicines correctly?
- (1) Yes  
 (2) No  
 (77) N/A-not HIV-positive or not taking ART

**Thank you for your time. We have completed the interview.**
