# Supplementary material for: Active pediatric HIV case finding in Kenya and Uganda: A look at missed opportunities along the prevention of mother-to-child transmission of HIV (PMTCT) cascade
Source: PubMed Central journal article supplement (PMC7266341; doi:10.1371/journal.pone.0233590), 2020-06-02
Supplement: pone.0233590.s002.pdf [file pone.0233590.s002.pdf]

### Testing and Treatment Facilities/Communities

|                                                                                  |  |
|----------------------------------------------------------------------------------|--|
| <b>Health Facility Name where HIV testing was performed</b>                      |  |
| <b>Health Facility ID</b>                                                        |  |
| <b>Community Catchment Area</b> <i>(if applicable)</i>                           |  |
| <b>Community Testing Provider</b> <i>(if applicable)</i>                         |  |
| <b>Health Facility Name where ART services are being provided</b>                |  |
| <b>Health Facility ID</b> <i>(ID to be assigned later if non-study facility)</i> |  |

Select only one response unless otherwise indicated.

### Child Follow-up Visits

| Question                                                                                                           | Response Code                                                                                                                                                                                                                                                |
|--------------------------------------------------------------------------------------------------------------------|--------------------------------------------------------------------------------------------------------------------------------------------------------------------------------------------------------------------------------------------------------------|
| 1. Is the child receiving care at the facility where the child was referred to following diagnosis?                | <input type="checkbox"/> (0) No –child receiving care at different facility<br><input type="checkbox"/> (1) Yes<br><input type="checkbox"/> (77) N/A –child not receiving care <i>(skip to Defaulter Tracing Section)</i>                                    |
| 2. Date of initial HIV antibody positive test:                                                                     | ____ / ____ / ____ (dd/mm/yy)<br><br><input type="checkbox"/> (77) N/A for children <18 months (Uganda) or <12 months (Kenya)                                                                                                                                |
| 3. Date positive DNA-PCR sample was collected:                                                                     | ____ / ____ / ____ (dd/mm/yy)<br><br><input type="checkbox"/> (77) N/A<br><input type="checkbox"/> (99) Date unknown                                                                                                                                         |
| 4. Date of positive DNA-PCR result receipt by mother/caregiver:                                                    | ____ / ____ / ____ (dd/mm/yy)<br><br><input type="checkbox"/> (77) N/A                                                                                                                                                                                       |
| 5. Date of confirmatory HIV test:                                                                                  | ____ / ____ / ____ (dd/mm/yy)<br><br><input type="checkbox"/> (1) Confirmatory test not done<br><input type="checkbox"/> (99) Date unknown                                                                                                                   |
| 6. Result of confirmatory HIV test:                                                                                | <input type="checkbox"/> (1) HIV-positive<br><input type="checkbox"/> (2) HIV-negative<br><input type="checkbox"/> (3) Indeterminate<br><input type="checkbox"/> (4) Result never received                                                                   |
| 7. What illnesses/OIs did the child present with at time of HIV enrollment in care? <i>(select all that apply)</i> | <input type="checkbox"/> (1) None<br><input type="checkbox"/> (2) Zoster<br><input type="checkbox"/> (3) TB<br><input type="checkbox"/> (4) Cryptococcal meningitis<br><input type="checkbox"/> (5) Failure to thrive<br><input type="checkbox"/> (6) Thrush |

|                                                                          |                                                                                                                                                                                                                                                                                                                                                                                                                 |
|--------------------------------------------------------------------------|-----------------------------------------------------------------------------------------------------------------------------------------------------------------------------------------------------------------------------------------------------------------------------------------------------------------------------------------------------------------------------------------------------------------|
|                                                                          | <input type="checkbox"/> (7) Fever<br><input type="checkbox"/> (8) Weight loss<br><input type="checkbox"/> (9) Pneumonia<br><input type="checkbox"/> (10) Chronic upper respiratory tract infections (cough)<br><input type="checkbox"/> (11) Malnutrition<br><input type="checkbox"/> (12) Persistent diarrhea<br><input type="checkbox"/> (99) Unknown                                                        |
| <p>8. What was the child's WHO stage at time of enrollment in care?</p>  | <input type="checkbox"/> (1) WHO Stage I<br><input type="checkbox"/> (2) WHO Stage II<br><input type="checkbox"/> (3) WHO Stage III<br><input type="checkbox"/> (4) WHO Stage IV<br><input type="checkbox"/> (99) Unknown                                                                                                                                                                                       |
| <p>9. Date of ART initiation</p>                                         | <p>___ ___ / ___ ___ / ___ ___ (dd/mm/yy)</p> <input type="checkbox"/> (77) N/A (not started on ART)<br><input type="checkbox"/> (99) Unknown                                                                                                                                                                                                                                                                   |
| <p>10. ART regimen</p>                                                   | <input type="checkbox"/> (1) ABC/3TC/ LPV/r<br><input type="checkbox"/> (2) ABC/3TC/EFV<br><input type="checkbox"/> (3) ABC/3TC/NVP<br><input type="checkbox"/> (4) ABC/3TC/AZT<br><input type="checkbox"/> (5) AZT/3TC/ABC<br><input type="checkbox"/> (6) TDF/3TC/EFV<br><input type="checkbox"/> (7) TDF/3TC/DTG<br><input type="checkbox"/> (77) N/A<br><input type="checkbox"/> (88) Other, specify: _____ |
| <p>11. CD4 Count (if available)</p>                                      | <input type="checkbox"/> (1) ___ ___ ___ cells/mm <sup>3</sup><br><input type="checkbox"/> (77) N/A                                                                                                                                                                                                                                                                                                             |
| <p>12. VL if available (<i>likely children under 18 months only</i>)</p> | <input type="checkbox"/> (1) ___ ___ ___ ___ ___ copies/ml<br><input type="checkbox"/> (77) N/A                                                                                                                                                                                                                                                                                                                 |

| Date of visit (dd/mm/yy)                                    | Services provided at this visit                                                                                                                                                                                                                                                                                                                                                                         | Adherence assessment                                                                                                                                 |
|-------------------------------------------------------------|---------------------------------------------------------------------------------------------------------------------------------------------------------------------------------------------------------------------------------------------------------------------------------------------------------------------------------------------------------------------------------------------------------|------------------------------------------------------------------------------------------------------------------------------------------------------|
| 13. ____ / ____ / ____<br><input type="checkbox"/> (77) N/A | <input type="checkbox"/> (1) ART pick-up<br><input type="checkbox"/> (2) Pre-ART counseling<br><input type="checkbox"/> (3) ART adherence counseling<br><input type="checkbox"/> (4) OI Treatment<br><input type="checkbox"/> (5) Nutrition assessment, counseling and support<br><input type="checkbox"/> (6) TB screening/IPT<br><input type="checkbox"/> (7) Non-HIV related medical visit/treatment | <input type="checkbox"/> (1) Good<br><input type="checkbox"/> (2) Fair<br><input type="checkbox"/> (3) Poor<br><input type="checkbox"/> (4) Not done |
| 14. ____ / ____ / ____<br><input type="checkbox"/> (77) N/A | <input type="checkbox"/> (1) ART pick-up<br><input type="checkbox"/> (2) Pre-ART counseling<br><input type="checkbox"/> (3) ART adherence counseling<br><input type="checkbox"/> (4) OI Treatment<br><input type="checkbox"/> (5) Nutrition assessment, counseling and support<br><input type="checkbox"/> (6) TB screening/IPT<br><input type="checkbox"/> (7) Non-HIV related medical visit/treatment | <input type="checkbox"/> (1) Good<br><input type="checkbox"/> (2) Fair<br><input type="checkbox"/> (3) Poor<br><input type="checkbox"/> (4) Not done |
| 15. ____ / ____ / ____<br><input type="checkbox"/> (77) N/A | <input type="checkbox"/> (1) ART pick-up<br><input type="checkbox"/> (2) Pre-ART counseling<br><input type="checkbox"/> (3) ART adherence counseling<br><input type="checkbox"/> (4) OI Treatment<br><input type="checkbox"/> (5) Nutrition assessment, counseling and support<br><input type="checkbox"/> (6) TB screening/IPT<br><input type="checkbox"/> (7) Non-HIV related medical visit/treatment | <input type="checkbox"/> (1) Good<br><input type="checkbox"/> (2) Fair<br><input type="checkbox"/> (3) Poor<br><input type="checkbox"/> (4) Not done |
| 16. ____ / ____ / ____<br><input type="checkbox"/> (77) N/A | <input type="checkbox"/> (1) ART pick-up<br><input type="checkbox"/> (2) Pre-ART counseling<br><input type="checkbox"/> (3) ART adherence counseling<br><input type="checkbox"/> (4) OI Treatment<br><input type="checkbox"/> (5) Nutrition assessment, counseling and support<br><input type="checkbox"/> (6) TB screening/IPT<br><input type="checkbox"/> (7) Non-HIV related medical visit/treatment | <input type="checkbox"/> (1) Good<br><input type="checkbox"/> (2) Fair<br><input type="checkbox"/> (3) Poor<br><input type="checkbox"/> (4) Not done |
| 17. ____ / ____ / ____<br><input type="checkbox"/> (77) N/A | <input type="checkbox"/> (1) ART pick-up<br><input type="checkbox"/> (2) Pre-ART counseling<br><input type="checkbox"/> (3) ART adherence counseling<br><input type="checkbox"/> (4) OI Treatment<br><input type="checkbox"/> (5) Nutrition assessment, counseling and support<br><input type="checkbox"/> (6) TB screening/IPT<br><input type="checkbox"/> (7) Non-HIV related medical visit/treatment | <input type="checkbox"/> (1) Good<br><input type="checkbox"/> (2) Fair<br><input type="checkbox"/> (3) Poor<br><input type="checkbox"/> (4) Not done |
| 18. ____ / ____ / ____<br><input type="checkbox"/> (77) N/A | <input type="checkbox"/> (1) ART pick-up<br><input type="checkbox"/> (2) Pre-ART counseling<br><input type="checkbox"/> (3) ART adherence counseling<br><input type="checkbox"/> (4) OI Treatment<br><input type="checkbox"/> (5) Nutrition assessment, counseling and support<br><input type="checkbox"/> (6) TB screening/IPT<br><input type="checkbox"/> (7) Non-HIV related medical visit/treatment | <input type="checkbox"/> (1) Good<br><input type="checkbox"/> (2) Fair<br><input type="checkbox"/> (3) Poor<br><input type="checkbox"/> (4) Not done |

| <b>Facility/Community Defaulter Tracing</b>                                  |                                                                                                                                                                                                                          |                                                   |                                                                     |                                                                                                                                                                                                                                                                                                                                                                                                     |
|------------------------------------------------------------------------------|--------------------------------------------------------------------------------------------------------------------------------------------------------------------------------------------------------------------------|---------------------------------------------------|---------------------------------------------------------------------|-----------------------------------------------------------------------------------------------------------------------------------------------------------------------------------------------------------------------------------------------------------------------------------------------------------------------------------------------------------------------------------------------------|
| <b>Date of scheduled visit</b>                                               | <b>Actions Taken</b>                                                                                                                                                                                                     | <b>Date follow up attempts started (dd/mm/yy)</b> | <b>Able to contact client?</b>                                      | <b>Tracing outcome</b>                                                                                                                                                                                                                                                                                                                                                                              |
| 19. ____ / ____ / ____<br><input type="checkbox"/> (77) N/A                  | <input type="checkbox"/> (1) Phone call to client<br><input type="checkbox"/> (2) Phone call to treatment supporter<br><input type="checkbox"/> (3) Home visits<br><input type="checkbox"/> (4) Other, specify:<br>_____ | ____ / ____ / ____                                | <input type="checkbox"/> (1) Yes<br><input type="checkbox"/> (2) No | <input type="checkbox"/> (1) Rescheduled appointment<br><input type="checkbox"/> (2) Declined to attend<br><input type="checkbox"/> (3) Self-transfer to another HF<br><input type="checkbox"/> (4) Change of residence<br><input type="checkbox"/> (5) Too sick to attend health facility<br><input type="checkbox"/> (6) Child deceased<br><input type="checkbox"/> (88) Other, specify:<br>_____ |
| 20. <sup>True,</sup> ____ / ____ / ____<br><input type="checkbox"/> (77) N/A | <input type="checkbox"/> (1) Phone call to client<br><input type="checkbox"/> (2) Phone call to treatment supporter<br><input type="checkbox"/> (3) Home visits<br><input type="checkbox"/> (4) Other, specify:<br>_____ | ____ / ____ / ____                                | <input type="checkbox"/> (1) Yes<br><input type="checkbox"/> (2) No | <input type="checkbox"/> (1) Rescheduled appointment<br><input type="checkbox"/> (2) Declined to attend<br><input type="checkbox"/> (3) Self-transfer to another HF<br><input type="checkbox"/> (4) Change of residence<br><input type="checkbox"/> (5) Too sick to attend health facility<br><input type="checkbox"/> (6) Child deceased<br><input type="checkbox"/> (88) Other, specify:<br>_____ |
| 21. ____ / ____ / ____<br><input type="checkbox"/> (77) N/A                  | <input type="checkbox"/> (1) Phone call to client<br><input type="checkbox"/> (2) Phone call to treatment supporter<br><input type="checkbox"/> (3) Home visits<br><input type="checkbox"/> (4) Other, specify:<br>_____ | ____ / ____ / ____                                | <input type="checkbox"/> (1) Yes<br><input type="checkbox"/> (2) No | <input type="checkbox"/> (1) Rescheduled appointment<br><input type="checkbox"/> (2) Declined to attend<br><input type="checkbox"/> (3) Self-transfer to another HF<br><input type="checkbox"/> (4) Change of residence<br><input type="checkbox"/> (5) Too sick to attend health facility<br><input type="checkbox"/> (6) Child deceased<br><input type="checkbox"/> (88) Other, specify:<br>_____ |
| 22. ____ / ____ / ____<br><input type="checkbox"/> (77) N/A                  | <input type="checkbox"/> (1) Phone call to client<br><input type="checkbox"/> (2) Phone call to treatment supporter<br><input type="checkbox"/> (3) Home visits<br><input type="checkbox"/> (4) Other, specify:<br>_____ | ____ / ____ / ____                                | <input type="checkbox"/> (1) Yes<br><input type="checkbox"/> (2) No | <input type="checkbox"/> (1) Rescheduled appointment<br><input type="checkbox"/> (2) Declined to attend<br><input type="checkbox"/> (3) Self-transfer to another HF<br><input type="checkbox"/> (4) Change of residence<br><input type="checkbox"/> (5) Too sick to attend health facility<br><input type="checkbox"/> (6) Child deceased<br><input type="checkbox"/> (88) Other, specify:<br>_____ |

**Study-specific Tracing (If child did not return within 6-8 weeks)**

| Question                                                                                                                       | Response                                                                                                                                                                                                                                                                                                                                                                                                                                                                                                                                                                                                                                                                                                                                         |
|--------------------------------------------------------------------------------------------------------------------------------|--------------------------------------------------------------------------------------------------------------------------------------------------------------------------------------------------------------------------------------------------------------------------------------------------------------------------------------------------------------------------------------------------------------------------------------------------------------------------------------------------------------------------------------------------------------------------------------------------------------------------------------------------------------------------------------------------------------------------------------------------|
| 23. Since your child tested positive for HIV in [facility or community name], has your child been seen in any HIV care clinic? | <input type="checkbox"/> (0) No – skip to Q28<br><input type="checkbox"/> (1) Yes, facility name? _____                                                                                                                                                                                                                                                                                                                                                                                                                                                                                                                                                                                                                                          |
| 24. Was your child retested for HIV at this other facility?                                                                    | <input type="checkbox"/> (0) No, why not? _____<br>– skip to Q31<br><input type="checkbox"/> (1) Yes                                                                                                                                                                                                                                                                                                                                                                                                                                                                                                                                                                                                                                             |
| 25. What was the HIV test result?                                                                                              | <input type="checkbox"/> (1) HIV-positive<br><input type="checkbox"/> (2) HIV-negative<br><input type="checkbox"/> (3) Indeterminate<br><input type="checkbox"/> (4) Result never received                                                                                                                                                                                                                                                                                                                                                                                                                                                                                                                                                       |
| 26. What was the date your child was started on ART treatment?                                                                 | ____ / ____ / ____ (dd/mm/yy)<br><input type="checkbox"/> (77) N/A - not started on ART, why not?<br>_____<br><input type="checkbox"/> (99) Unknown                                                                                                                                                                                                                                                                                                                                                                                                                                                                                                                                                                                              |
| 27. What ART regimen is the child taking? – then skip to Q31                                                                   | <input type="checkbox"/> (1) ABC/3TC/ LPV/r<br><input type="checkbox"/> (2) ABC/3TC/EFV<br><input type="checkbox"/> (3) ABC/3TC/NVP<br><input type="checkbox"/> (4) ABC/3TC/AZT<br><input type="checkbox"/> (5) AZT/3TC/ABC<br><input type="checkbox"/> (6) TDF/3TC/EFV<br><input type="checkbox"/> (7) TDF/3TC/DTG<br><input type="checkbox"/> (77) N/A<br><input type="checkbox"/> (88) Other, specify: _____<br><input type="checkbox"/> (99) Unknown                                                                                                                                                                                                                                                                                         |
| 28. Why did you decide not to return to the clinic for your child's care? (select all that apply)                              | <input type="checkbox"/> (1) Financial reasons<br><input type="checkbox"/> (2) Child does not have time (e.g., attending school)<br><input type="checkbox"/> (3) Caregiver does not have time (e.g., work)<br><input type="checkbox"/> (4) Child was enrolled in care at a different facility<br><input type="checkbox"/> (5) Change of residence<br><input type="checkbox"/> (6) Too sick to attend health facility<br><input type="checkbox"/> (7) Child deceased<br><input type="checkbox"/> (8) Mother/caregiver or other contact could not be reached<br><input type="checkbox"/> (9) Child was well /didn't need treatment<br><input type="checkbox"/> (10) Lack/fear of disclosure<br><input type="checkbox"/> (88) Other, specify: _____ |
| 29. Provide further details on each of the responses selected.                                                                 |                                                                                                                                                                                                                                                                                                                                                                                                                                                                                                                                                                                                                                                                                                                                                  |
